# Supplementary material for: Atomistic insight into the interaction of aspartic acid species with calcium carbonate: model development
Source: Royal Society of Chemistry journal article supplement (doi:10.1039/d5fd00008d), 2025-01-01
Supplement: d5fd00008d2.pdf [file d5fd00008d2.pdf]

# Supplementary Information: Atomistic insight into the interaction of aspartic acid species with calcium carbonate: model development

Raffaella Demichelis<sup>\*a</sup>, Blake I. Armstrong<sup>a</sup>, Paolo Raiteri<sup>a</sup> and Julian D. Gale<sup>a</sup>

Received Xth XXXXXXXXXXXX 20XX, Accepted Xth XXXXXXXXXXXX 20XX

First published on the web Xth XXXXXXXXXXXX 200X

DOI: 10.1039/b000000x

## 1 Force field

All the parameters for calcium carbonate and water were taken from Armstrong *et al.*<sup>1</sup> and Wu *et al.*<sup>2</sup> Atom labels, force field functional forms, intra-molecular parameters, and charges for aspartic acid species are reported in Schuitemaker *et al.*<sup>3</sup> (2023). Tables 1 and 2 contain the inter-molecular parameters involving aspartic acid species and changes with respect to Schuitemaker *et al.*<sup>3</sup> are highlighted in bold. This corresponds to FF2 in the paper. The parameters used for acetate were taken from Schuitemaker *et al.*<sup>4</sup> (2021), Table 1 reports those describing its interaction with calcium carbonate, with changes with respect to the original model highlighted in bold and labels as in original paper. The addition of a repulsive interaction between C4-O15 (carbon of carbonate and oxygen of acetate) prevents acetate from getting too close to carbonate as a consequence of the constraints in our metadynamics simulation; gas phase paring free energy profiles with and without this potential overlap, meaning that the addition of this potential will not affect surface binding results. A file containing the full potential model is shared in the Supplementary Information package.

**Table 1** Buckingham and AB Lennard-Jones potentials for the interactions between aspartic acid species and calcium carbonate. The  $\text{CO}_3^{2-}$ -Asp potential is one of the options proposed in the paper, based on the assumption that the parameters developed for glycine,<sup>4</sup> derived from the interaction of methylammonium and acetate with calcite, can be used as such for aspartic acid. Labels are as in Schuitemaker *et al.*<sup>3</sup> (2023) for aspartate and Schuitemaker *et al.*<sup>4</sup> (2021) for acetate.

| Buckingham                                                      | A [eV]           | $\rho$ [Å]      | C [eV Å <sup>6</sup> ] | A-B Lennard-Jones | A [eV Å <sup>6</sup> ] | B [eV Å <sup>12</sup> ] |
|-----------------------------------------------------------------|------------------|-----------------|------------------------|-------------------|------------------------|-------------------------|
| <b>Ca<sup>2+</sup>-Asp</b>                                      |                  |                 |                        |                   |                        |                         |
| Ca - O71                                                        | 2388.4841        | <b>0.265011</b> | 0.0                    | Ca - C72          | 12000.0                | 0.0                     |
| Ca - O75                                                        | 2388.4841        | <b>0.265011</b> | 0.0                    | Ca - C74          | 12000.0                | 0.0                     |
| Ca - N73                                                        | 22878.8          | 0.215023        | 0.                     |                   |                        |                         |
| <b>CO<sub>3</sub><sup>2-</sup>-Asp from glycine<sup>4</sup></b> |                  |                 |                        |                   |                        |                         |
| O4 - H73                                                        | 719.5374         | 0.25            | 0.0                    | O4 - H72          | 46.5625                | 0.0                     |
| O4 - H76                                                        | 719.5374         | 0.25            | 0.0                    | O4 - H74          | 46.5625                | 0.0                     |
| O4 - C71                                                        | 53.9625          | 0.57            | 0.0                    |                   |                        |                         |
| O4 - C75                                                        | 53.9625          | 0.57            | 0.0                    |                   |                        |                         |
| <b>Ca<sup>2+</sup>-Acetate<sup>4</sup></b>                      |                  |                 |                        |                   |                        |                         |
| Ca - O15                                                        | 2388.4841        | 0.27151         | 0.0                    | Ca - C14          | 12000.0                | 0.0                     |
| <b>CO<sub>3</sub><sup>2-</sup>-Acetate<sup>4</sup></b>          |                  |                 |                        |                   |                        |                         |
| O4 - C15                                                        | 67.475158        | 0.57            | 0.0                    | O4 - H14          | 34.0                   | 0.0                     |
| <b>C4 - O15</b>                                                 | <b>67.475158</b> | <b>0.57</b>     | 0.0                    |                   |                        |                         |

<sup>c</sup> School of Molecular and Life Sciences, Curtin University, GPO Box U1987, 6845 Perth, Western Australia, Australia; raffaella.demichelis@curtin.edu.au

**Table 2** 12-6 Lennard-Jones parameters for inter-molecular interactions involving aspartic acid species. The parameters for  $\text{CO}_3^{2-}$ -Asp are a second option proposed in the paper, revised from Schuitemaker *et al.*<sup>3</sup> where they had been derived from the inter-molecular aspartate-aspartate parameters in water. Labels are as in Schuitemaker *et al.*<sup>3</sup>

|                | $\epsilon$ [eV] | $\sigma$ [Å]   |                                          | $\epsilon$ [eV] | $\sigma$ [Å]   |
|----------------|-----------------|----------------|------------------------------------------|-----------------|----------------|
| <b>Asp-Asp</b> |                 |                | <b>water-Asp</b>                         |                 |                |
| C71 - C71      | 0.00288         | 3.58118        | O2 - C71                                 | 0.00440         | 3.36701        |
| C71 - C72      | 0.00288         | 3.58118        | O2 - C72                                 | 0.00440         | 3.36701        |
| C71 - C74      | 0.00288         | 3.58118        | O2 - C74                                 | 0.00440         | 3.36701        |
| C71 - C75      | 0.00288         | 3.58118        | O2 - C75                                 | 0.00440         | 3.36701        |
| C71 - H72      | 0.00188         | <b>3.15541</b> | O2 - H72                                 | 0.00288         | 2.74105        |
| C71 - H74      | 0.00188         | <b>3.15541</b> | O2 - H74                                 | 0.00288         | 2.74105        |
| C71 - N73      | 0.00437         | 3.35146        | O2 - N73                                 | 0.00332         | 3.47115        |
| C71 - N76      | 0.00437         | 3.35146        | O2 - N76                                 | 0.00332         | 3.47115        |
| C71 - O71      | 0.00717         | 3.06654        | O2 - O71a                                | 0.00513         | 3.27240        |
| C71 - O75      | 0.00717         | 3.06654        | O2 - O75a                                | 0.00513         | 3.27240        |
| C72 - C72      | 0.00288         | 3.58118        | O2 - O71b                                | 0.00513         | <b>3.27240</b> |
| C72 - C74      | 0.00288         | 3.58118        | O2 - O75b                                | 0.00513         | <b>3.27240</b> |
| C72 - C75      | 0.00288         | 3.58118        | H2 - H76                                 | 0.00123         | 2.45000        |
| C72 - H72      | 0.00188         | 2.91541        |                                          |                 |                |
| C72 - H74      | 0.00188         | 2.91541        | <b><math>\text{CO}_3^{2-}</math>-Asp</b> |                 |                |
| C72 - N73      | 0.00437         | 3.35146        | C4 - H74                                 | 0.00188         | 2.91541        |
| C72 - N76      | 0.00437         | 3.35146        | C4 - N73                                 | 0.00437         | 3.35146        |
| O71 - C72      | 0.00717         | 3.06654        | C4 - N76                                 | 0.00437         | 3.35146        |
| C72 - O75      | 0.00717         | 3.06654        | O4 - C72                                 | 0.00717         | 3.06654        |
| C74 - C74      | 0.00288         | 3.58118        | O4 - H72                                 | 0.00468         | 2.49644        |
| C74 - C75      | 0.00288         | 3.58118        | O4 - C74                                 | 0.00717         | 3.06654        |
| H72 - C74      | 0.00188         | 2.91541        | O4 - H74                                 | 0.00468         | 2.49644        |
| C74 - H74      | 0.00188         | 2.91541        | O4 - N73                                 | 0.00152         | 3.98580        |
| N73 - C74      | 0.00437         | 3.35146        | O4 - N76                                 | 0.00152         | 3.98580        |
| N76 - C74      | 0.00437         | 3.35146        | C4 - C72                                 | 0.00288         | 3.58118        |
| O71 - C74      | 0.00717         | 3.06654        | C4 - C71                                 | 0.00288         | 3.58118        |
| C74 - O75      | 0.00717         | 3.06654        | O4 - O71                                 | 0.01788         | 2.62585        |
| C75 - C75      | 0.00288         | 3.58118        | O4 - O75                                 | 0.01788         | 2.62585        |
| H72 - C75      | 0.00188         | <b>3.15541</b> | C4 - C72                                 | 0.00288         | 3.58118        |
| H74 - C75      | 0.00188         | <b>3.15541</b> | C4 - H72                                 | 0.00188         | 2.91541        |
| N73 - C75      | 0.00437         | 3.35146        | C4 - C74                                 | 0.00288         | 3.58118        |
| N76 - C75      | 0.00437         | 3.35146        |                                          |                 |                |
| O71 - C75      | 0.00717         | 3.06654        |                                          |                 |                |
| C75 - O75      | 0.00717         | 3.06654        |                                          |                 |                |
| H72 - H72      | 0.00123         | 2.37341        |                                          |                 |                |
| H72 - H74      | 0.00123         | 2.37341        |                                          |                 |                |
| H72 - N73      | 0.00285         | 2.72839        |                                          |                 |                |
| H72 - N76      | 0.00285         | 2.72839        |                                          |                 |                |
| O71 - H72      | 0.00468         | 2.49644        |                                          |                 |                |
| H72 - O75      | 0.00468         | 2.49644        |                                          |                 |                |
| H74 - H74      | 0.00123         | 2.37341        |                                          |                 |                |
| N73 - H74      | 0.00285         | 2.72839        |                                          |                 |                |
| N76 - H74      | 0.00285         | 2.72839        |                                          |                 |                |
| O71 - H74      | 0.00468         | 2.49644        |                                          |                 |                |
| H74 - O75      | 0.00468         | 2.49644        |                                          |                 |                |
| N73 - N73      | 0.00663         | 3.13647        |                                          |                 |                |
| N76 - N76      | 0.00663         | 3.13647        |                                          |                 |                |
| O71 - N73      | 0.00152         | <b>4.05580</b> |                                          |                 |                |
| O71 - N76      | 0.00152         | <b>4.05580</b> |                                          |                 |                |
| N73 - O75      | 0.00152         | <b>4.05580</b> |                                          |                 |                |
| N76 - O75      | 0.00152         | <b>4.05580</b> |                                          |                 |                |
| O71 - O71      | 0.01788         | 2.62585        |                                          |                 |                |
| O71 - O75      | 0.01788         | 2.62585        |                                          |                 |                |
| O75 - O75      | 0.01788         | 2.62585        |                                          |                 |                |

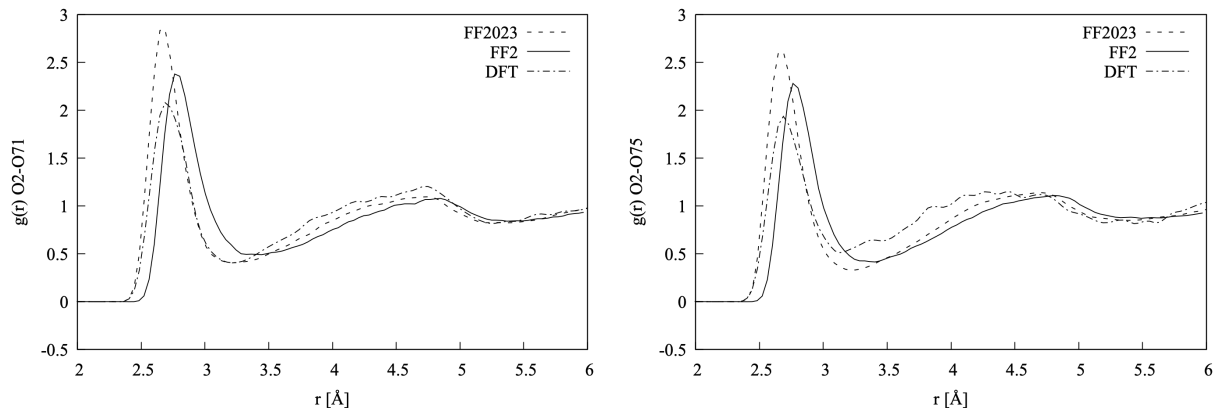

**Fig. 1** Pairing distribution function between the oxygen of water (O2) and the oxygen of the carboxylate groups in L-Asp<sup>2-</sup> (O71 and O75) with DFT, the force field from Schuitemaker *et al.*<sup>3</sup>, and the force field in this work FF2

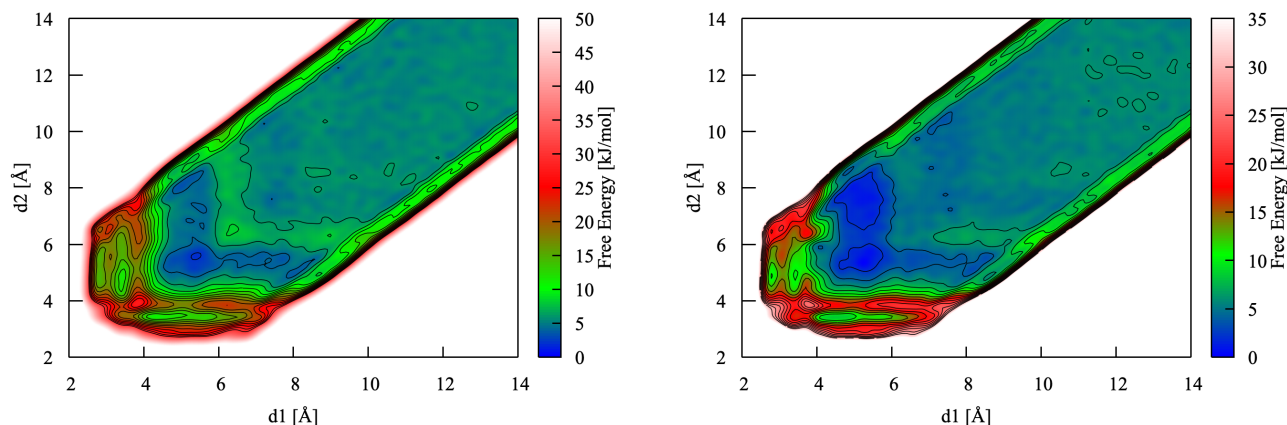

**Fig. 2** Calcium aspartate pairing free energy projected along the distance between calcium and each carboxylate group ( $d1$  and  $d2$ ), obtained with FF2: Ca<sup>2+</sup> L-AspZW<sup>-</sup> (left) and Ca<sup>2+</sup> L-Asp<sup>2-</sup> (right).

## 2 Pairing distribution function

Figure 1 shows the pairing distribution function between the oxygen of water and the oxygen of the carboxylate groups in aspartate. Agreement/disagreement between the force field and DFT results is qualitative, given that DFT simulations have been run for only a few tens of ps.

## 3 Pairing free energy

The pairing free energy of calcium aspartate computed through metadynamics using the torsional angle and the distances between each of the carboxylate functional groups and calcium ( $d1$  and  $d2$ ) as collective variables. Figure 2 shows pairing free energy projected along  $d1$  and  $d2$ , confirming a preference for solvent-shared interactions, while the formation of contact ion pairs is disfavoured. These projections are very similar to those obtained in Schuitemaker *et al.*<sup>3</sup>, with contact ion pairing being slightly more disfavoured for Ca<sup>2+</sup> L-Asp<sup>2-</sup> with FF2. This is mostly due to calcium binding more strongly to water in Armstrong *et al.*<sup>1</sup>'s parametrization. More details and the 1-D profiles are in the main text.

---

## References

- 1 B. I. Armstrong, A. Silvestri, R. Demichelis, P. Raiteri and J. D. Gale, *Phil. Trans. A*, 2023, **381**, 202220250.
- 2 Y. Wu, H. L. Tepper and G. A. Voth, *The Journal of Chemical Physics*, 2006, **124**, 024503.
- 3 A. Schuitemaker, K. B. Koziara, P. Raiteri, J. D. Gale and R. Demichelis, *Phys. Chem. Chem. Phys.*, 2024, **26**, 4909–4921.
- 4 A. Schuitemaker, J. Aufort, K. K. Koziara, R. Demichelis, P. Raiteri and J. D. Gale, *Phys. Chem. Chem. Phys.*, 2021, **23**, 27253–27265.
